# Supplementary material for: Gallium(iii)–2-benzoylpyridine-thiosemicarbazone complexes promote apoptosis through Ca2+ signaling and ROS-mediated mitochondrial pathways
Source: Royal Society of Chemistry journal article supplement (doi:10.1039/c8nj00697k), 2018-01-01
Supplement: c8nj00697k1.pdf [file c8nj00697k1.pdf]

## Electronic Supplementary Information

*Gallium(III)-2-benzoylpyridine-thiosemicarbazone complexes promote apoptosis through Ca<sup>2+</sup> signaling and ROS-mediated mitochondrial pathways*

Jinxu Qi <sup>1</sup>, Kun Qian <sup>1</sup>, Liang Tian <sup>1</sup>, Zhen Cheng <sup>2</sup> and Yihong Wang <sup>\*1</sup>

### Table of Contents

|                                                                                             |    |
|---------------------------------------------------------------------------------------------|----|
| Crystal Data of three Ga(III) complexes. ....                                               | S2 |
| Selected Bond Lengths (Å) and Angles (deg). ....                                            | S3 |
| Interference of ligands and Ga(III) complexes with the MTT assay in a cell-free system..... | S4 |
| The logP predicted with Chemdraw.....                                                       | S4 |
| The UV-Visible absorption of ligands and Ga complexes. ....                                 | S5 |
| <sup>1</sup> H Spectra and HRMS for target compounds.....                                   | S6 |

**Table S1** Crystal Data of three Ga(III) complexes.

| GA(III) complexes                 | C1                                                                                  | C2                                                                             | C3                                                                             |
|-----------------------------------|-------------------------------------------------------------------------------------|--------------------------------------------------------------------------------|--------------------------------------------------------------------------------|
| Empirical formula                 | C <sub>26</sub> H <sub>24.5</sub> GaN <sub>9</sub> O <sub>4.25</sub> S <sub>2</sub> | C <sub>38</sub> H <sub>30</sub> GaN <sub>9</sub> O <sub>3</sub> S <sub>2</sub> | C <sub>32</sub> H <sub>38</sub> GaN <sub>9</sub> O <sub>5</sub> S <sub>2</sub> |
| Formula weight                    | 666.90                                                                              | 794.55                                                                         | 762.55                                                                         |
| Temperature/K                     | 296.15                                                                              | 296.15                                                                         | 296.15                                                                         |
| Crystal system                    | monoclinic                                                                          | triclinic                                                                      | monoclinic                                                                     |
| Space group                       | P2 <sub>1</sub> /c                                                                  | P-1                                                                            | P2 <sub>1</sub> /n                                                             |
| a/Å                               | 13.263(4)                                                                           | 10.891(4)                                                                      | 18.466(3)                                                                      |
| b/Å                               | 11.598(4)                                                                           | 12.977(4)                                                                      | 8.9272(14)                                                                     |
| c/Å                               | 18.773(6)                                                                           | 14.074(5)                                                                      | 21.798(4)                                                                      |
| $\alpha$ /°                       | 90                                                                                  | 91.872(6)                                                                      | 90                                                                             |
| $\beta$ /°                        | 94.273(5)                                                                           | 97.259(5)                                                                      | 94.344(3)                                                                      |
| $\gamma$ /°                       | 90                                                                                  | 109.477(5)                                                                     | 90                                                                             |
| Volume/Å <sup>3</sup>             | 2879.8(15)                                                                          | 1854.4(10)                                                                     | 3583.0(10)                                                                     |
| Z                                 | 4                                                                                   | 2                                                                              | 4                                                                              |
| Index ranges                      | -16 ≤ h ≤ 16,<br>-14 ≤ k ≤ 14,<br>-23 ≤ l ≤ 23                                      | -13 ≤ h ≤ 13,<br>-15 ≤ k ≤ 15,<br>-17 ≤ l ≤ 16                                 | -23 ≤ h ≤ 22,<br>-11 ≤ k ≤ 11,<br>-27 ≤ l ≤ 27                                 |
| Goodness-of-fit on F <sup>2</sup> | 0.976                                                                               | 1.041                                                                          | 1.030                                                                          |
| Final R indexes [all data]        | R <sub>1</sub> = 0.0424,<br>wR <sub>2</sub> = 0.1214                                | R <sub>1</sub> = 0.0959,<br>wR <sub>2</sub> = 0.2076                           | R <sub>1</sub> = 0.0499,<br>wR <sub>2</sub> = 0.1362                           |
| CCDC NO.                          | 1488962                                                                             | 1488961                                                                        | 1488960                                                                        |

**Table S2.** Selected Bond Lengths (Å) and Angles (deg)

|           | C1         | C2         | C3         |
|-----------|------------|------------|------------|
| Ga1-S2    | 2.3536(9)  | 2.3595(15) | 2.3660(7)  |
| Ga1-S1    | 2.3728(8)  | 2.3390(13) | 2.3666(8)  |
| Ga1-N6    | 2.0822(17) | 2.045(3)   | 2.036(2)   |
| Ga1-N2    | 2.0769(17) | 2.045(3)   | 2.051(2)   |
| Ga1-N5    | 2.1292(18) | 2.168(4)   | 2.1071(19) |
| Ga1-N1    | 2.1065(18) | 2.125(3)   | 2.0997(19) |
| S2-Ga1-S1 | 98.30(2)   | 99.97(6)   | 99.33(3)   |
| N6-Ga1-S2 | 81.88(5)   | 82.46(10)  | 82.79(6)   |
| N6-Ga1-S1 | 105.19(5)  | 104.33(10) | 102.31(6)  |
| N6-Ga1-N5 | 76.91(7)   | 76.28(13)  | 77.77(8)   |
| N6-Ga1-N1 | 94.67(7)   | 94.67(13)  | 97.38(8)   |
| N2-Ga1-S2 | 109.16(5)  | 105.95(10) | 100.83(6)  |
| N2-Ga1-S1 | 81.83(5)   | 82.67(10)  | 82.53(5)   |
| N2-Ga1-N6 | 166.24(7)  | 168.19(13) | 173.51(7)  |
| N2-Ga1-N5 | 91.51(7)   | 94.36(13)  | 98.06(8)   |
| N2-Ga1-N1 | 77.33(7)   | 77.24(13)  | 77.31(7)   |
| N5-Ga1-S2 | 158.65(5)  | 158.05(10) | 159.86(6)  |
| N5-Ga1-S1 | 89.63(5)   | 90.62(10)  | 89.98(6)   |
| N1-Ga1-S2 | 91.14(5)   | 90.68(11)  | 90.40(6)   |
| N1-Ga1-S1 | 158.98(5)  | 159.22(10) | 158.95(6)  |
| N1-Ga1-N5 | 88.22(7)   | 85.71(13)  | 86.95(7)   |

**Table S3.** Interference of ligands and Ga(III) complexes with the MTT assay in a cell-free system.

|                                   | Absorbance as % control |                   |                   |                   |                   |                   |                   |
|-----------------------------------|-------------------------|-------------------|-------------------|-------------------|-------------------|-------------------|-------------------|
|                                   | 0 $\mu$ M               | 0.1 $\mu$ M       | 0.5 $\mu$ M       | 1 $\mu$ M         | 5 $\mu$ M         | 50 $\mu$ M        | 100 $\mu$ M       |
| 3-AP                              | 100.14 $\pm$ 0.23       | 100.11 $\pm$ 0.24 | 100.00 $\pm$ 0.25 | 100.10 $\pm$ 0.23 | 99.99 $\pm$ 0.20  | 100.10 $\pm$ 0.21 | 99.89 $\pm$ 0.23  |
| L1                                | 100.21 $\pm$ 0.22       | 99.89 $\pm$ 0.25  | 100.10 $\pm$ 0.22 | 100.00 $\pm$ 0.20 | 100.11 $\pm$ 0.23 | 100.21 $\pm$ 0.23 | 100.00 $\pm$ 0.23 |
| L2                                | 100.00 $\pm$ 0.24       | 100.00 $\pm$ 0.21 | 100.19 $\pm$ 0.25 | 100.08 $\pm$ 0.21 | 99.98 $\pm$ 0.22  | 100.11 $\pm$ 0.20 | 100.21 $\pm$ 0.20 |
| L3                                | 100.23 $\pm$ 0.21       | 100.10 $\pm$ 0.22 | 100.11 $\pm$ 0.23 | 100.00 $\pm$ 0.25 | 100.01 $\pm$ 0.23 | 100.02 $\pm$ 0.23 | 100.23 $\pm$ 0.20 |
| C1                                | 99.93 $\pm$ 0.25        | 100.00 $\pm$ 0.24 | 99.82 $\pm$ 0.26  | 99.99 $\pm$ 0.23  | 100.13 $\pm$ 0.23 | 100.08 $\pm$ 0.20 | 100.09 $\pm$ 0.23 |
| C2                                | 100.32 $\pm$ 0.22       | 100.02 $\pm$ 0.20 | 100.00 $\pm$ 0.25 | 99.98 $\pm$ 0.20  | 100.21 $\pm$ 0.20 | 100.01 $\pm$ 0.23 | 100.02 $\pm$ 0.22 |
| C3                                | 100.11 $\pm$ 0.23       | 100.00 $\pm$ 0.22 | 100.05 $\pm$ 0.23 | 100.06 $\pm$ 0.20 | 100.03 $\pm$ 0.20 | 100.03 $\pm$ 0.21 | 100.00 $\pm$ 0.20 |
| Ga(NO <sub>3</sub> ) <sub>3</sub> | 100.21 $\pm$ 0.21       | 100.00 $\pm$ 0.20 | 100.21 $\pm$ 0.25 | 99.88 $\pm$ 0.20  | 99.93 $\pm$ 0.21  | 100.00 $\pm$ 0.22 | 100.02 $\pm$ 0.23 |
| Cell culture media                | 100.11 $\pm$ 0.12       | 100.11 $\pm$ 0.23 | 100.00 $\pm$ 0.25 | 99.99 $\pm$ 0.23  | 99.92 $\pm$ 0.23  | 99.93 $\pm$ 0.23  | 99.99 $\pm$ 0.23  |

**Table S4.** The logP predicted with Chemdraw.

|    | logP |
|----|------|
| L1 | 2.25 |
| L2 | 4.43 |
| L3 | 3.14 |

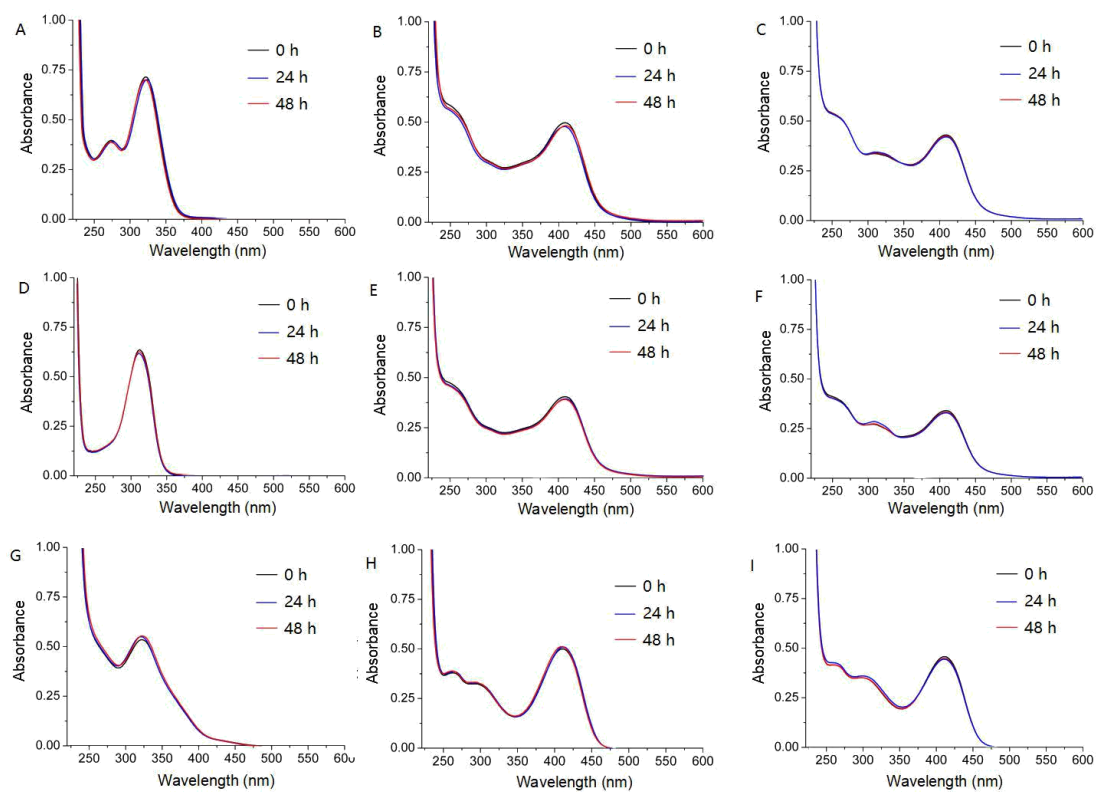

**Fig. S1** The UV-Visible absorption of ligands and Ga complexes. A: L1 in 0.1% DMSO aqueous solution; B: C1 in 0.1% DMSO aqueous solution; C: C1 in Tris-HCl (0.05mol/L, pH=7.5) buffer solution; D: L2 in 0.1% DMSO aqueous solution; E: C2 in 0.1% DMSO aqueous solution; F: C2 in Tris-HCl (0.05mol/L, pH=7.5) buffer solution; G: L3 in 0.1% DMSO aqueous solution; H: C3 in 0.1% DMSO aqueous solution; I: C3 in Tris-HCl (0.05mol/L, pH=7.5) buffer solution.

**<sup>1</sup>H Spectra and HRMS for target compounds in D<sub>2</sub>O : DMSO-d<sub>6</sub> = 7 : 3, pH = 7.5 solution.**

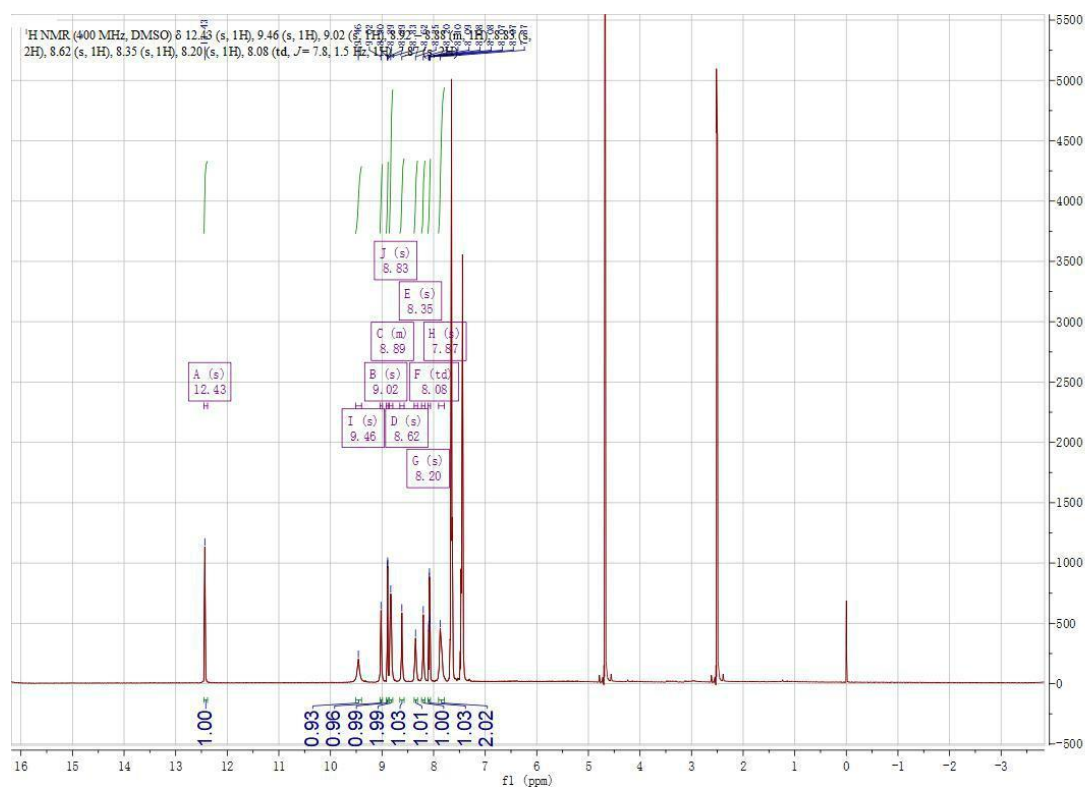

**<sup>1</sup>H NMR Spectra for L1**

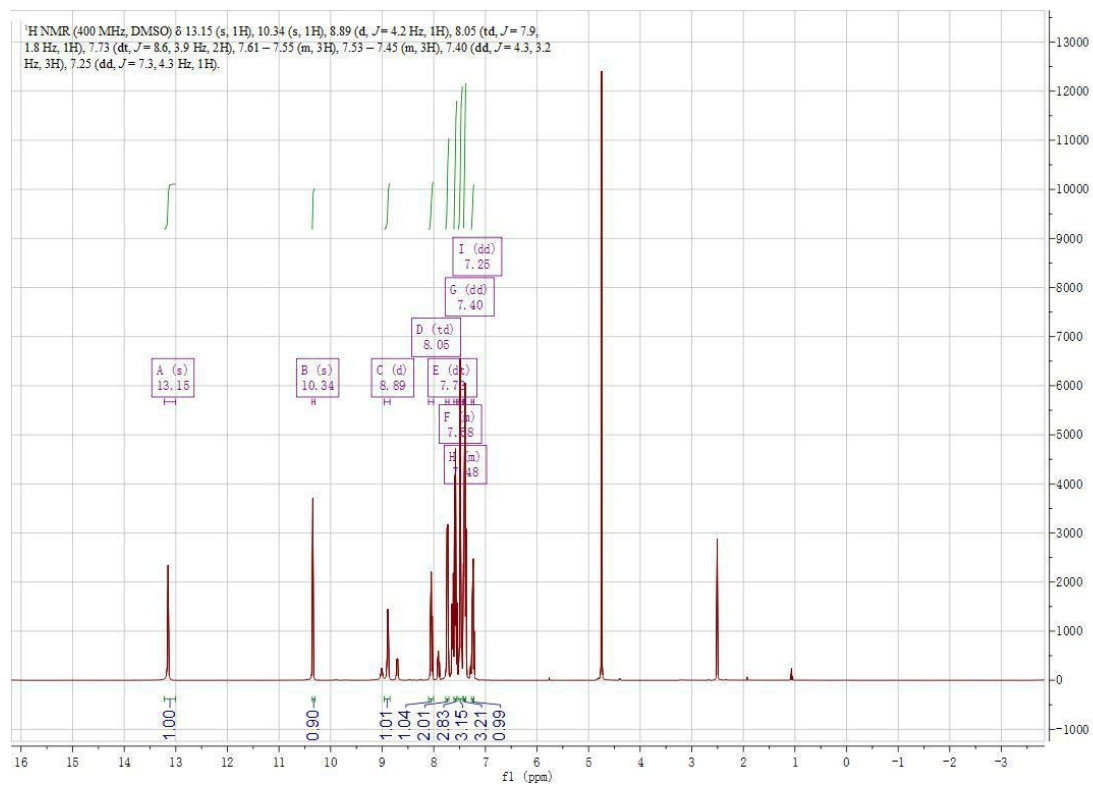

**<sup>1</sup>H NMR Spectra for L2**

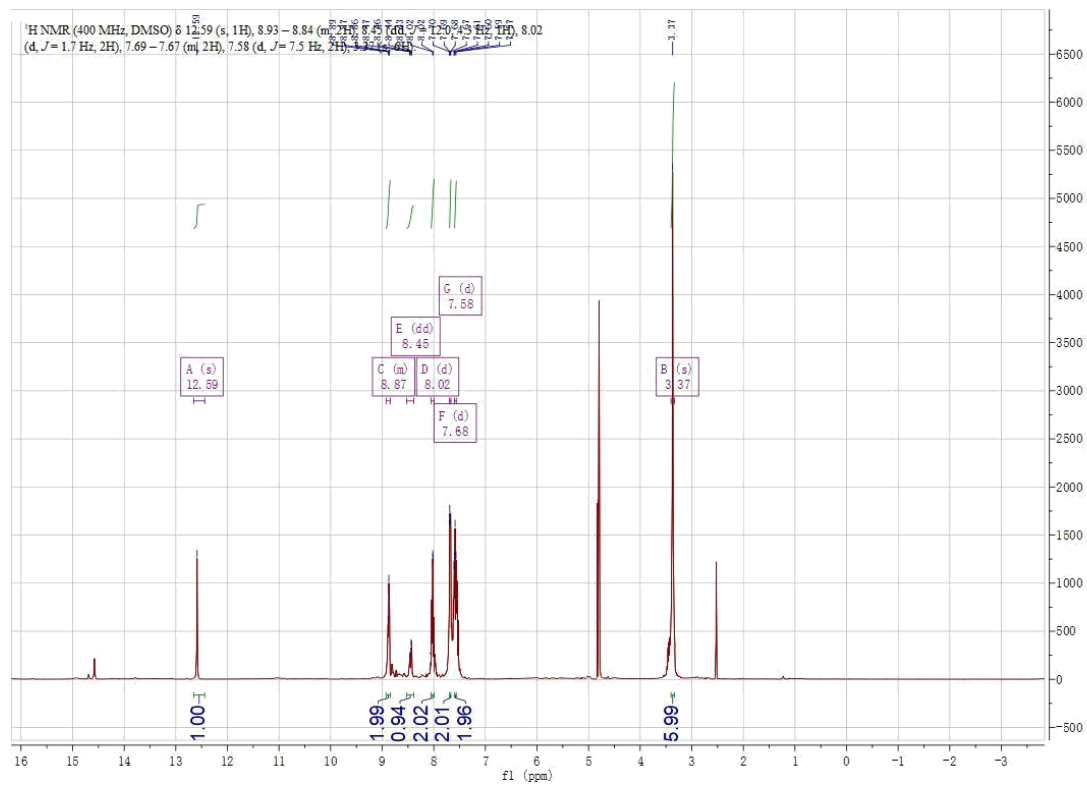

<sup>1</sup>H NMR Spectra for L3

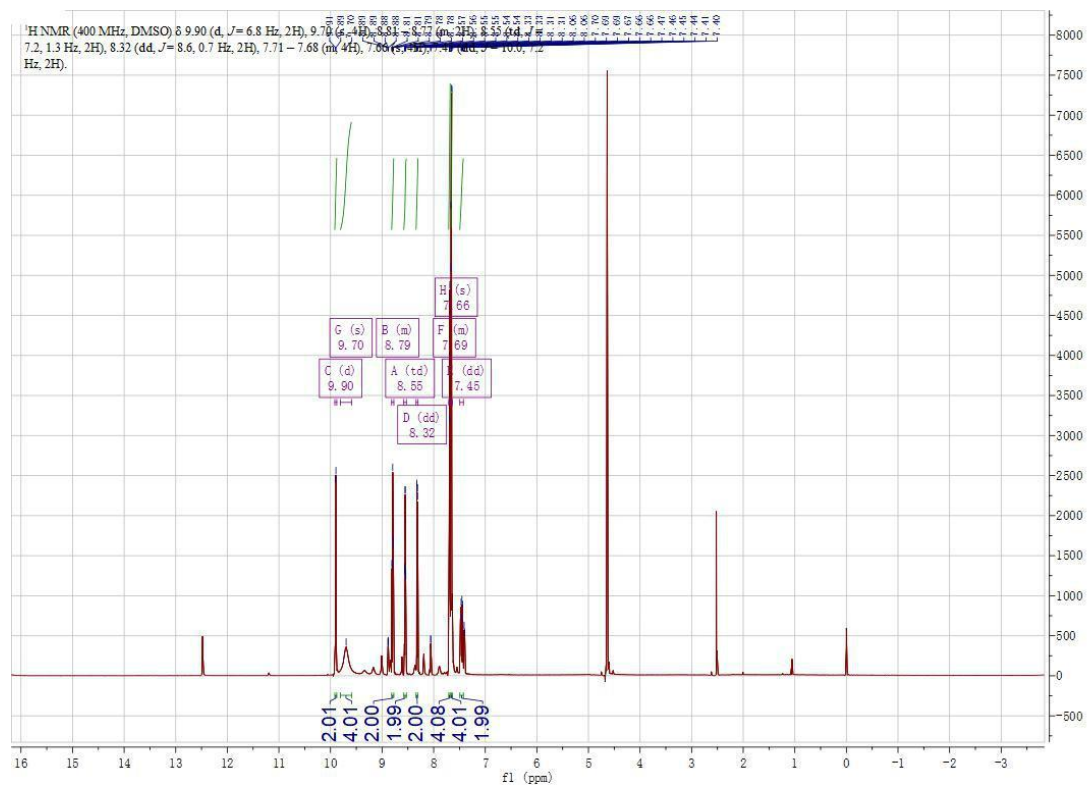

<sup>1</sup>H NMR Spectra for C1

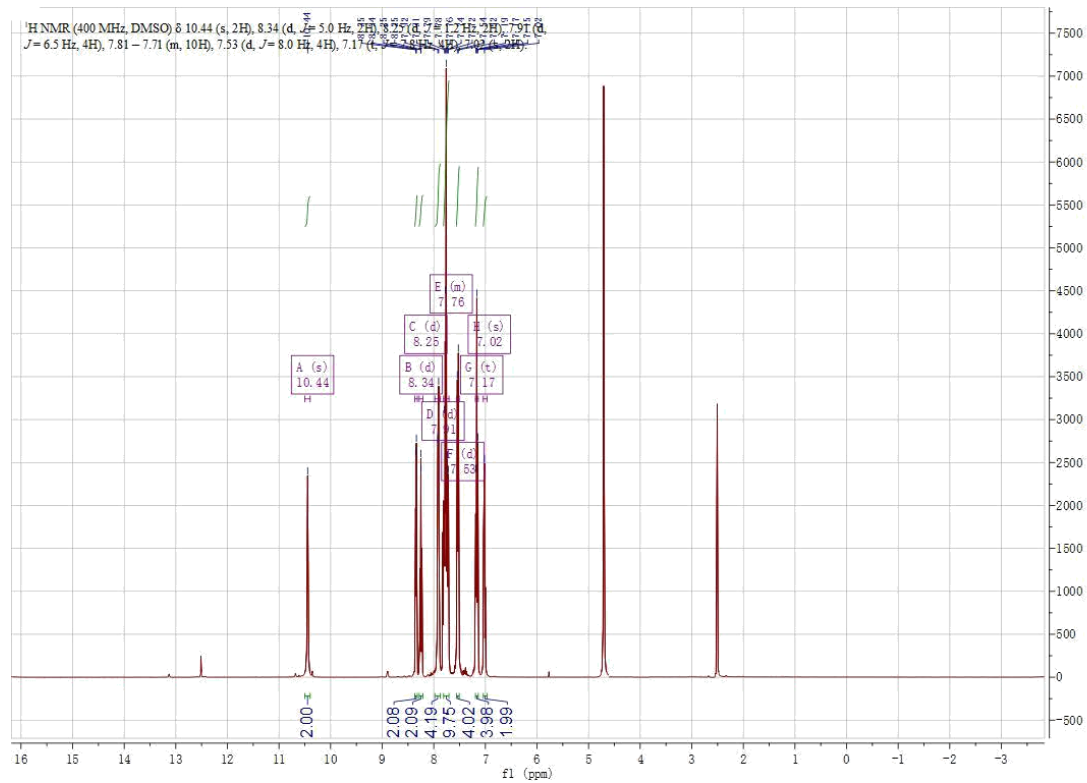

<sup>1</sup>H NMR Spectra for C2

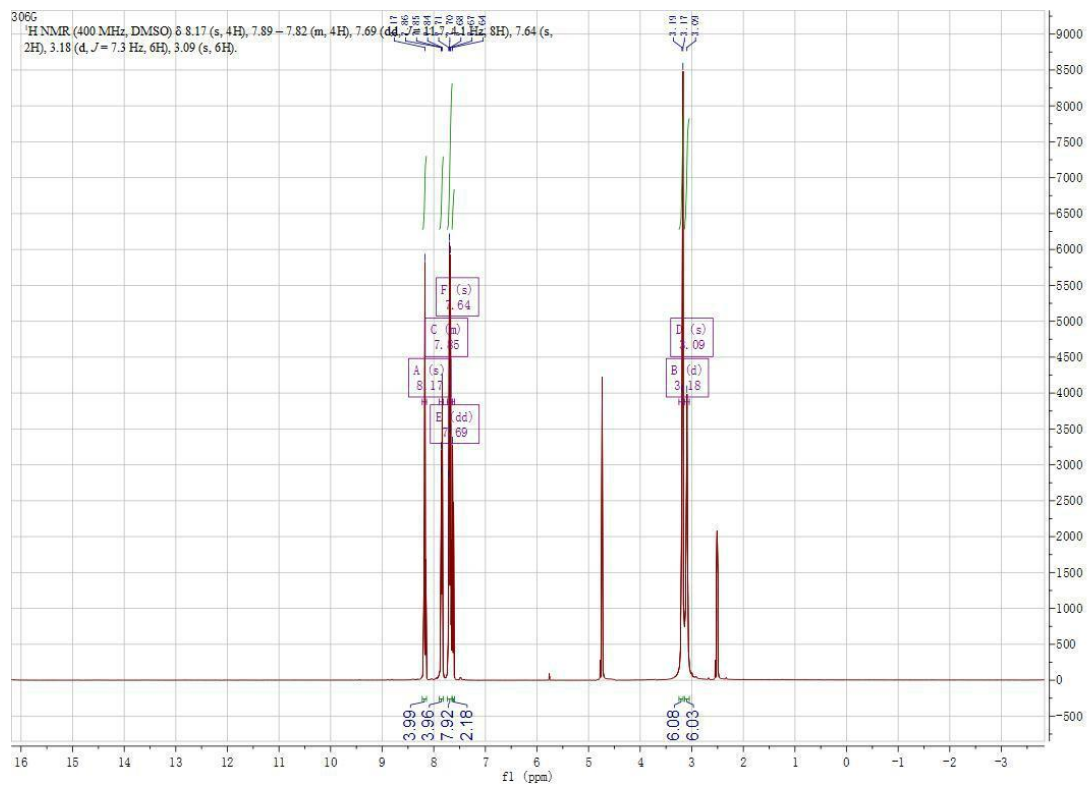

<sup>1</sup>H NMR Spectra for C3
